# Supplementary material for: Combination of Epithelial Growth Factor Receptor Blockers and CDK4/6 Inhibitor for Nasopharyngeal Carcinoma Treatment
Source: Cancers (Basel). 2021 Jun 12;13(12):2954. doi: 10.3390/cancers13122954 (PMC8231497; doi:10.3390/cancers13122954)
Supplement: Supplementary file 1 [file cancers-13-02954-s001.zip › cancers-1235722-supplementary.pdf]

# Combination of Epithelial Growth Factor Receptor Blockers and CDK4/6 Inhibitor for Nasopharyngeal Carcinoma Treatment

Hsin-Pai Li, Chen-Yang Huang, Kar-Wai Lui, Yin-Kai Chao, Chun-Nan Yeh, Li-Yu Lee, Yenlin Huang, Tung-Liang Lin, Yung-Chia Kuo, Mei-Yuan Huang, Yi-Ru Lai, Yuan-Ming Yeh, Hsien-Chi Fan, An-Chi Lin, Chia-Hsun Hsieh, Kai-Ping Chang, Chien-Yu Lin, Hung-Ming Wang, Yu-Sun Chang and Cheng-Lung Hsu

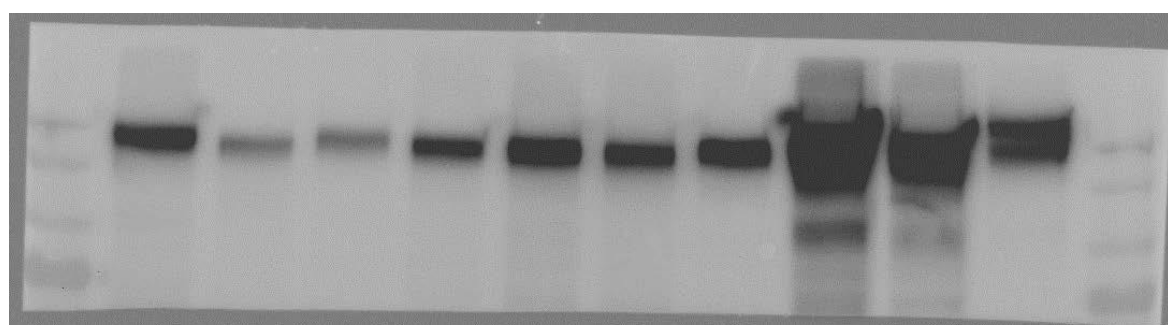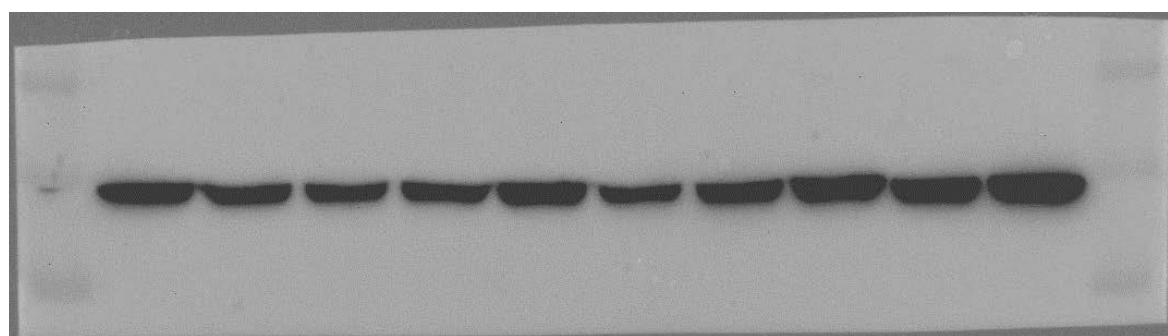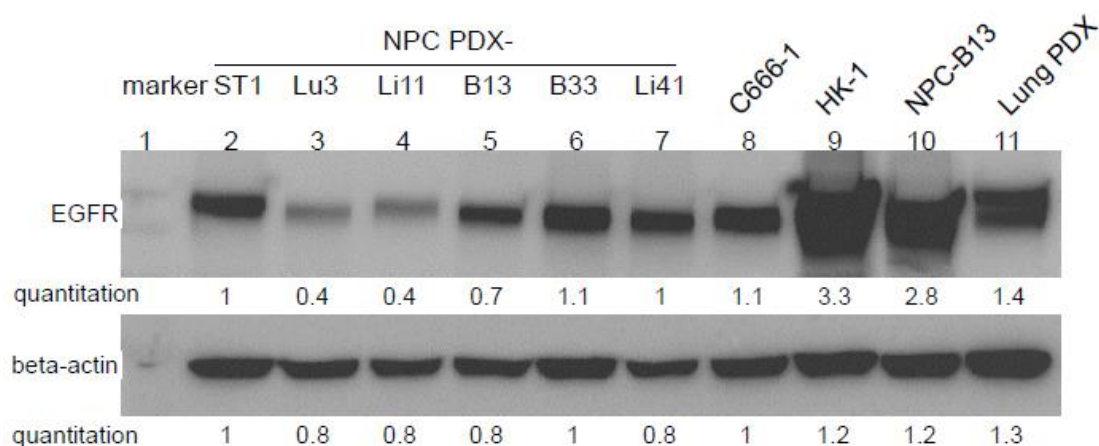

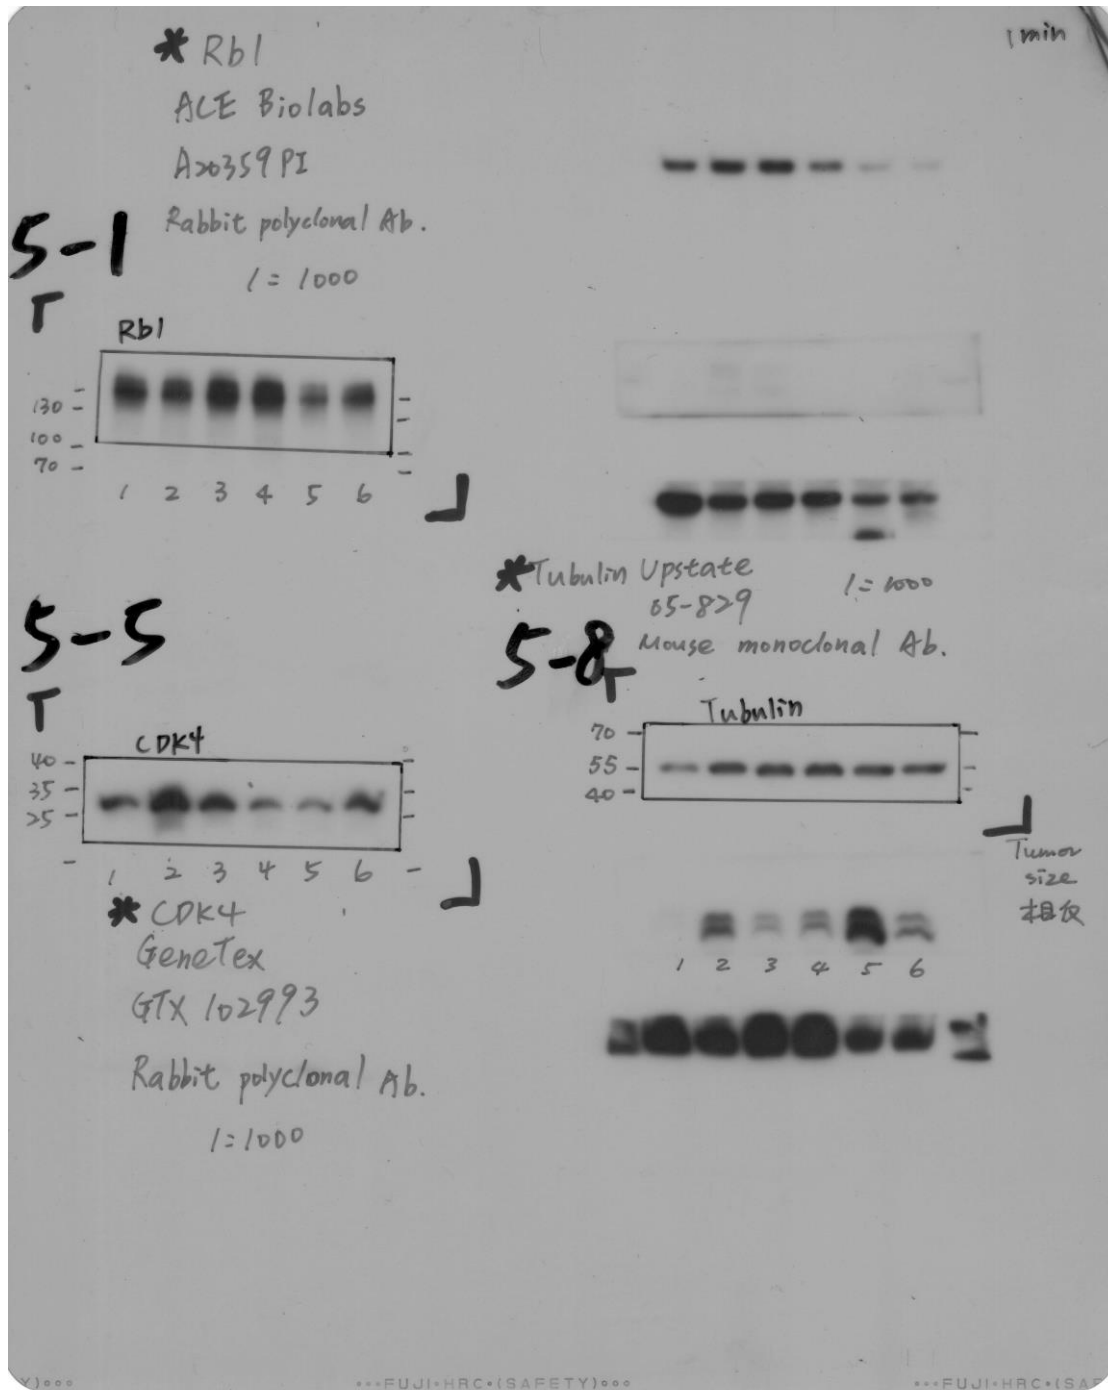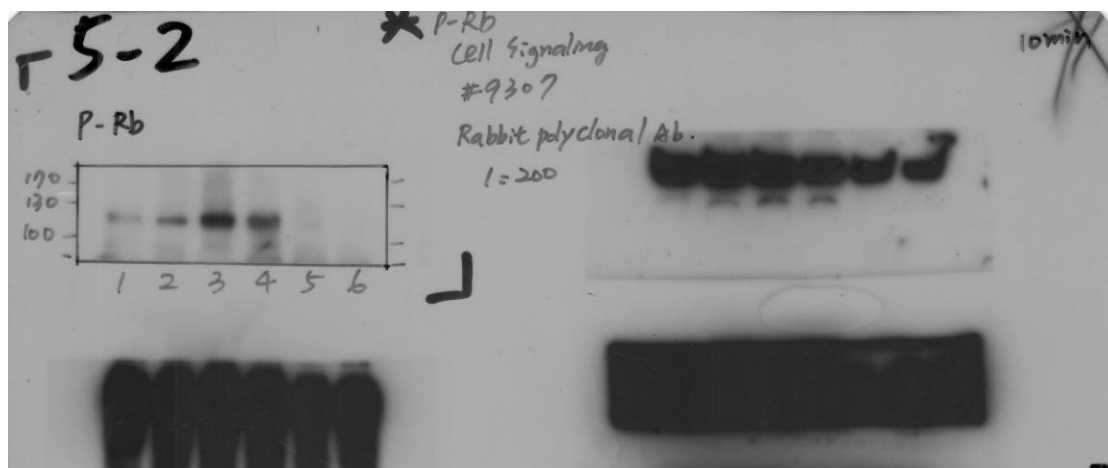

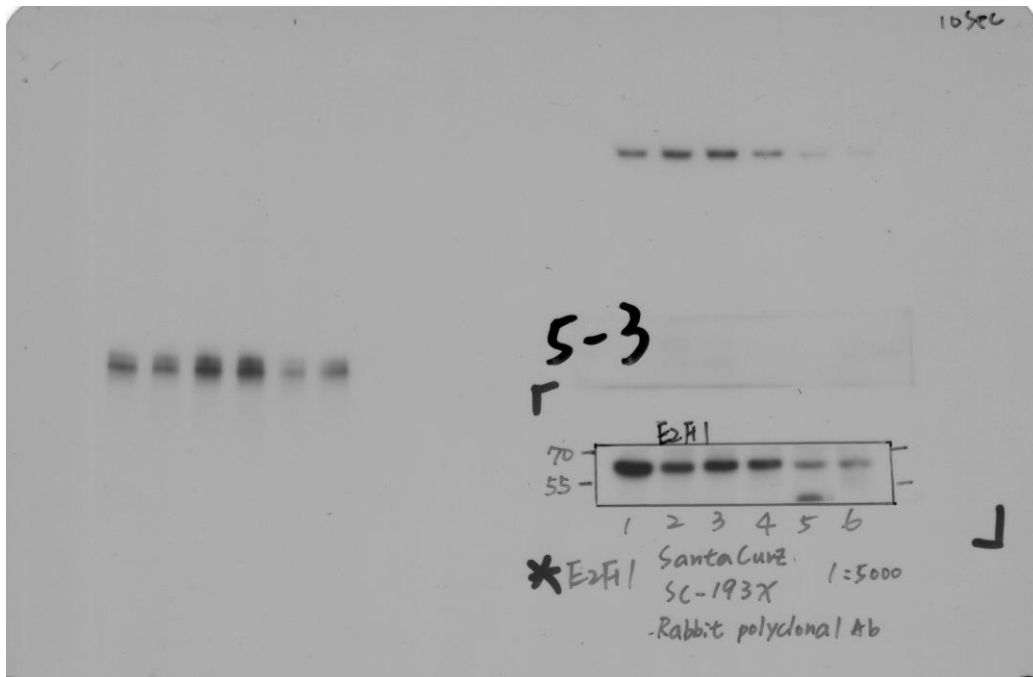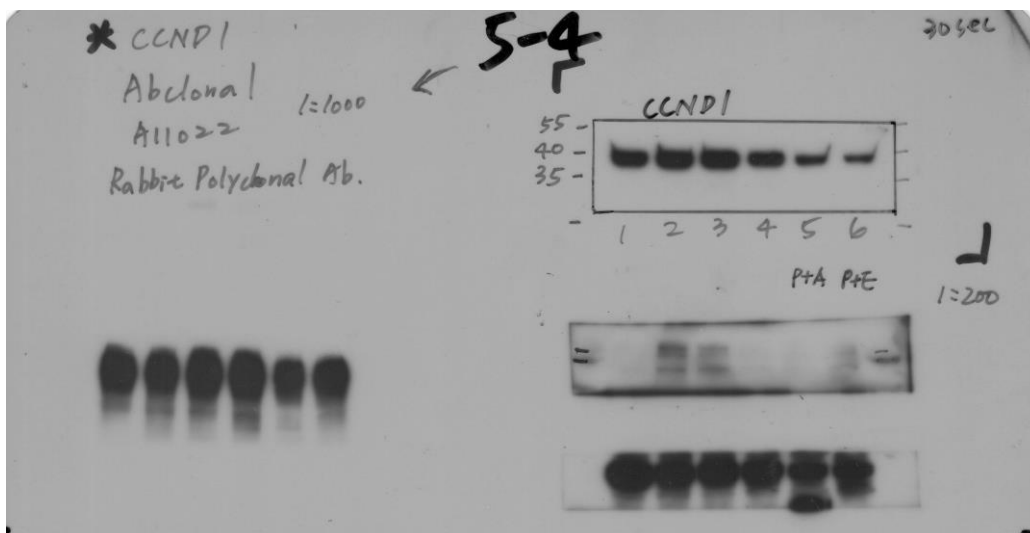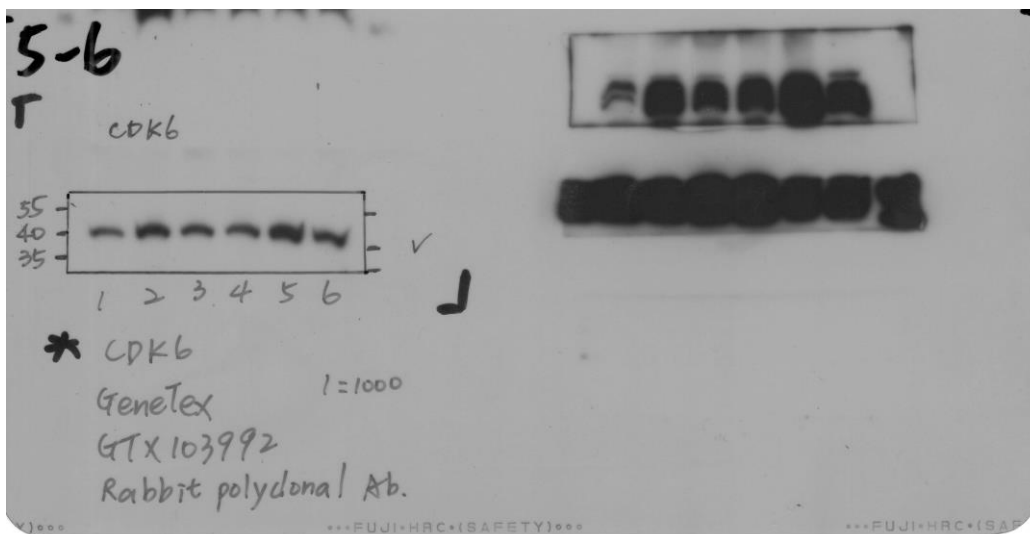

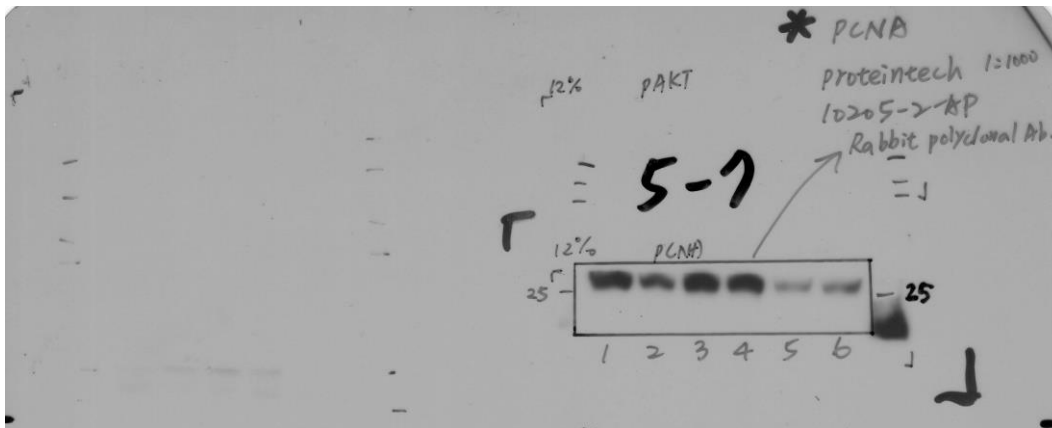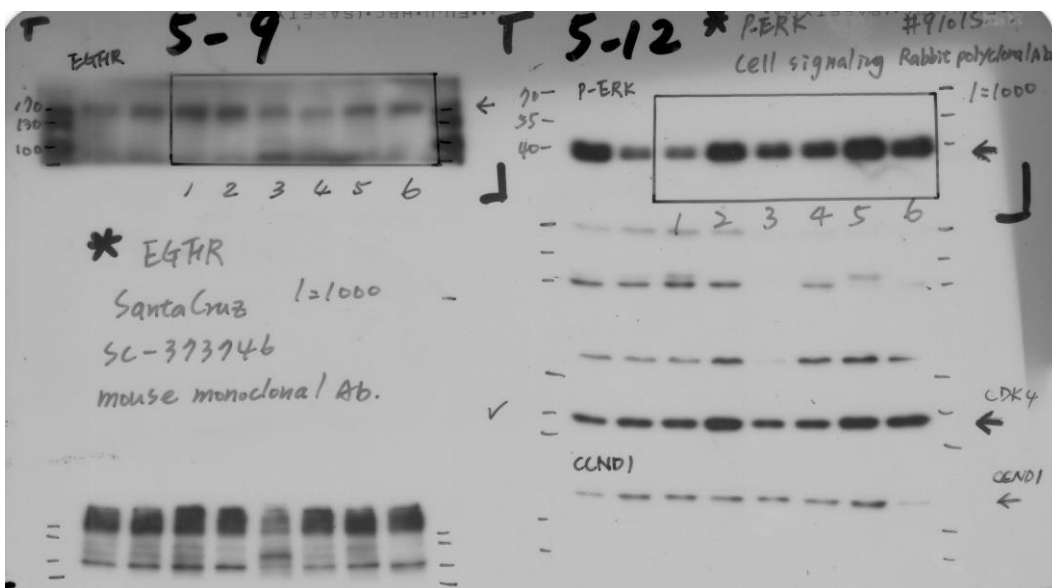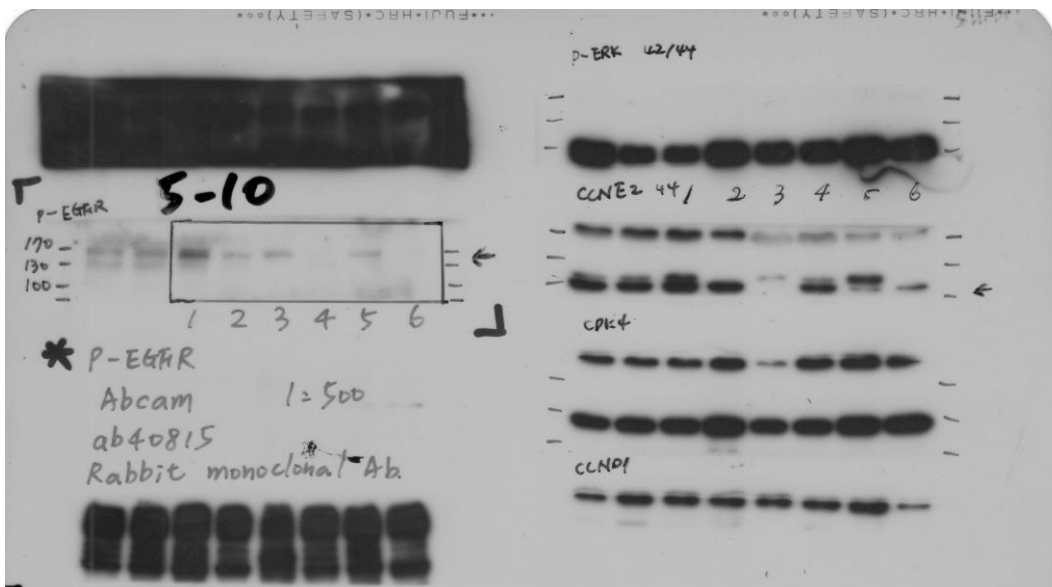

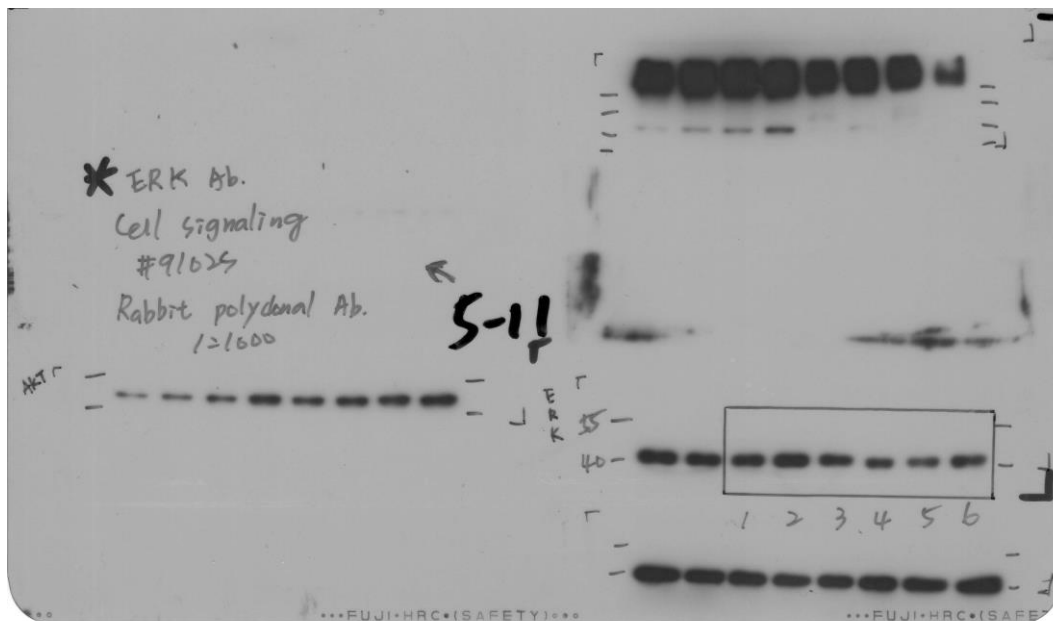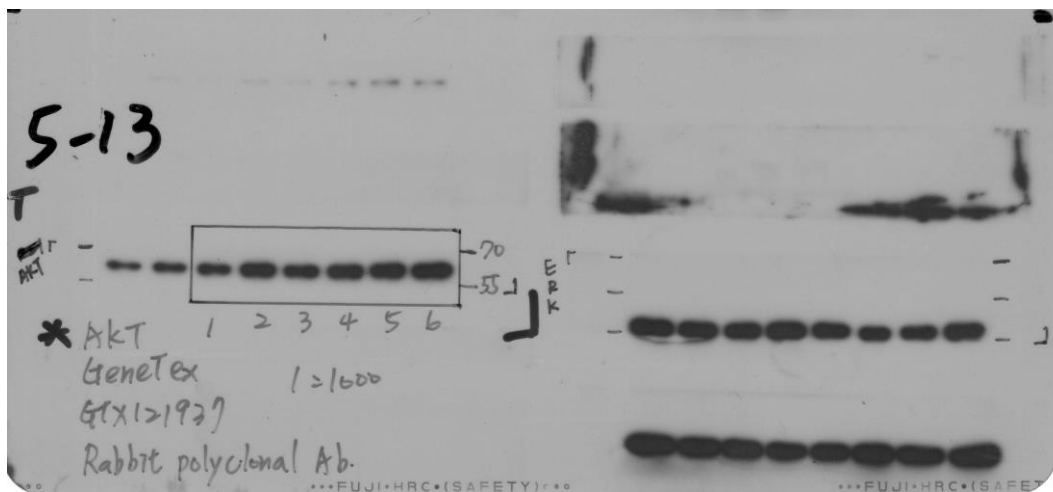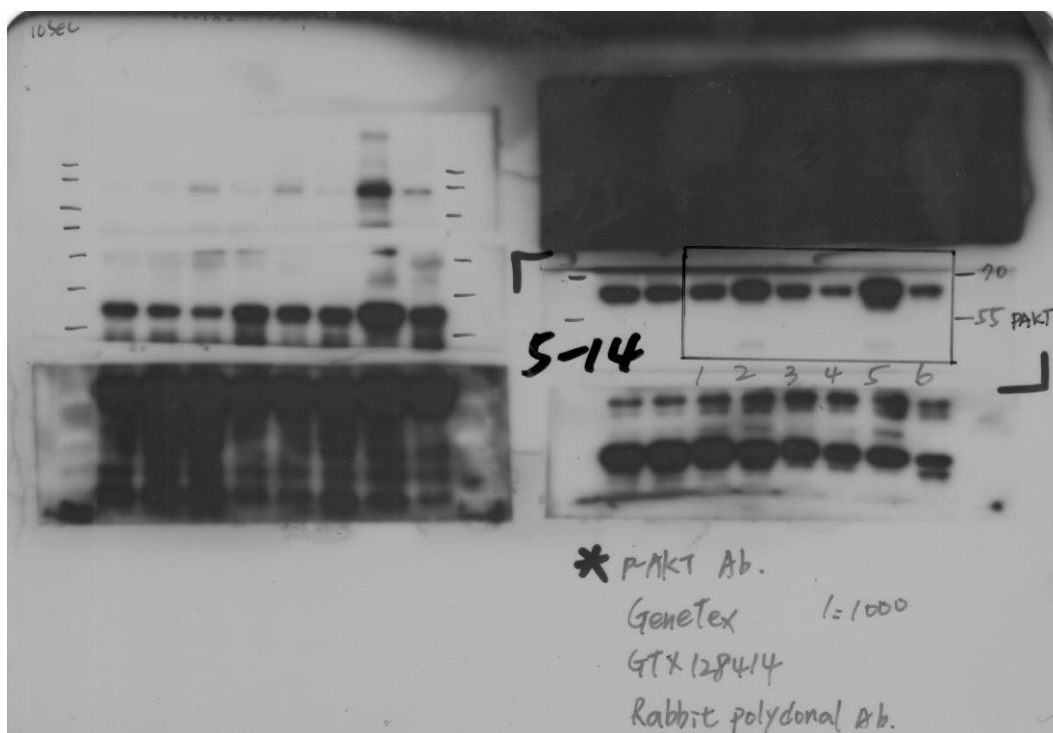

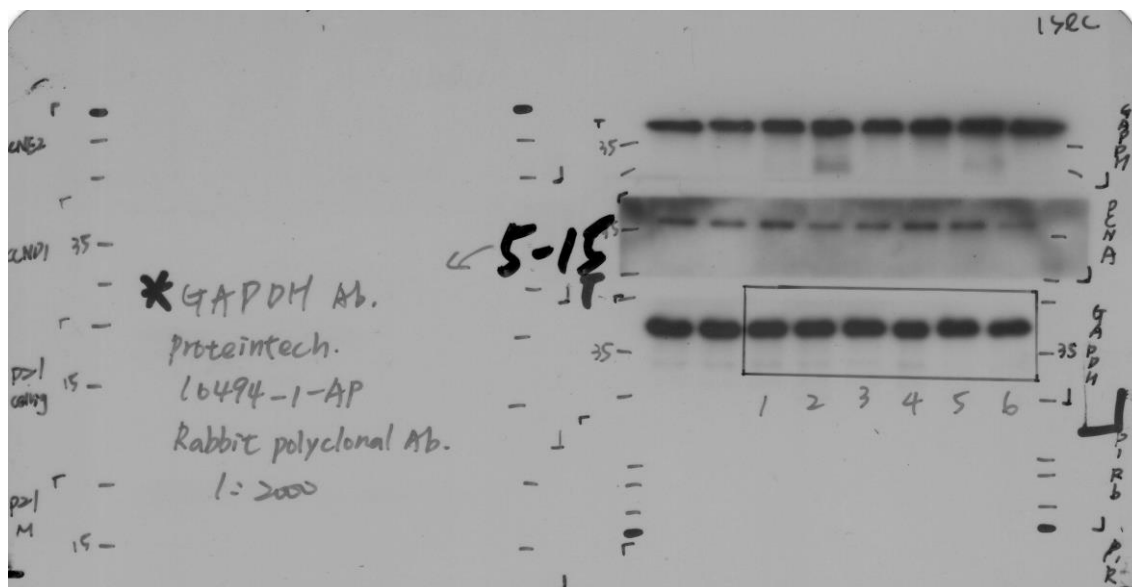

Fig. 5. Western blot analysis EGFR pathway and cell cycle key protein of NPC PDX-B13 tumor with or without EGFRi and/or Palbociclib treatment.

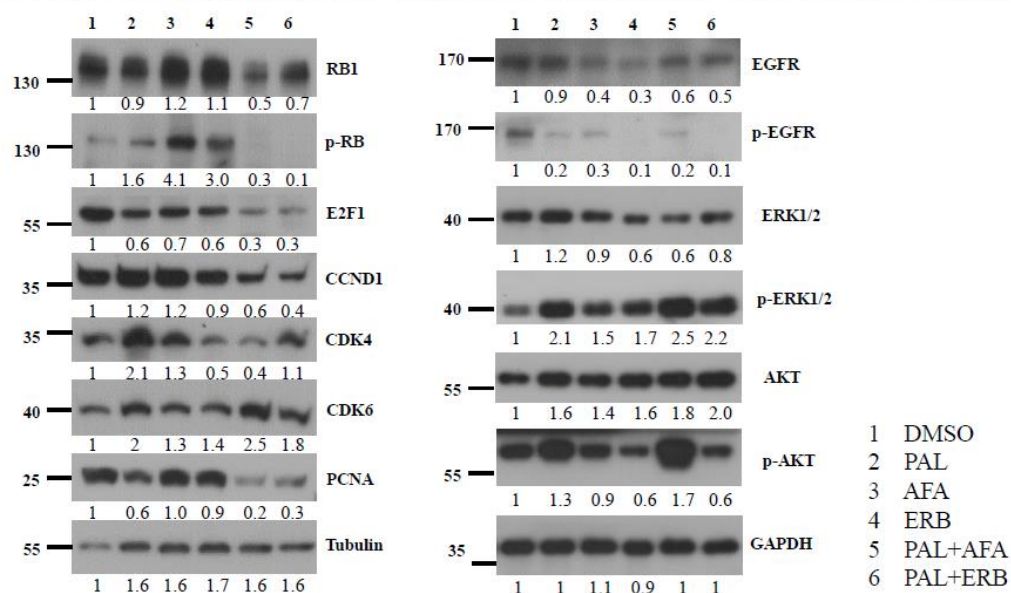

Figure S1. The uncropped western blots.

HPV genotyping by HPV Blot

Fifteen microliters of the resultant amplicons were then hybridized with a HPV Blot membrane. Thirty-eight types of HPV: 6, 11, 16, 18, 26, 31, 32, 33, 35, 37, 39, 42, 43, 44, 45, 51, 52, 53, 54, 55,56, 58, 59, 61, 62, 66, 67, 68, 69, 70, 71(CP8061), 72, 74, 81(CP8304), 82(MM4), 83(MM7), 84(MM8), L1AE5 can be detected in a single reaction as previously described (ref: Role of human papillomavirus status after conization for high-grade cervical intraepithelial neoplasia. Huang HJ, Tung HJ, Yang LY, Chao A, Tang YH, Chou HH, Chang WY, Wu RC, Huang CC, Lin CY, Liao MJ, Chen WC, Lin CT, Chen MY, Huang KG, Wang CJ, Chang TC, Lai CH. Int J Cancer. 2021 Feb 1;148(3):665-672. doi: 10.1002/ijc.33251. Epub 2020 Sep 1.)

(a)

|   | 1  | 2  | 3      | 4  | 5      | 6     | 7     | 8      | 9  | 10     | 11 | 12 |   |
|---|----|----|--------|----|--------|-------|-------|--------|----|--------|----|----|---|
| A | NC | SC | MM7    | 74 | 61     | 11    | 44    | 56     | 62 | CP8061 | 6  |    | A |
| B |    | IC | 18     | 54 | 39     | MM4   | 55    | CP8304 | 82 | 37     | 16 |    | B |
| C | 42 | 52 | 68     | 59 | 31     | 32    | SC    | 26     | 69 | 35     | 70 |    | C |
| D | 43 | 58 | 33     | 67 | 45     | MM8   | L1AE5 | 51     | 72 | 66     | 53 |    | D |
| E |    | 53 | 66     | 72 | 51     | L1AE5 | MM8   | 45     | 67 | 33     | 58 | 43 | E |
| F |    | 70 | 35     | 69 | 26     | SC    | 32    | 31     | 59 | 68     | 52 | 42 | F |
| G |    | 16 | 37     | 82 | CP8304 | 55    | MM4   | 39     | 54 | 18     | IC |    | G |
| H |    | 6  | CP8061 | 62 | 56     | 44    | 11    | 61     | 74 | MM7    | NC | SC | H |
|   | 1  | 2  | 3      | 4  | 5      | 6     | 7     | 8      | 9  | 10     | 11 | 12 |   |

(b) 1 2 3 4 5 6 7 8 9 10 11 12

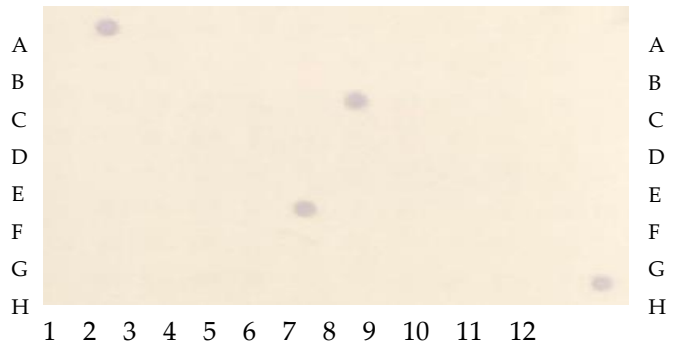

HK-1  
=>HPV negative

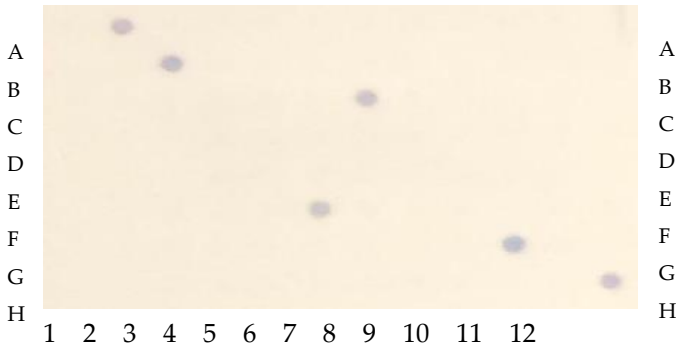

Positive control :  
Oropharyngeal cancer  
=>HPV18

**Figure S2.** HPV genotyping by HPV Blot. (a) The schematic diagram of HPV blot. (b) The L1 amplicons by using SPF1/GP6+ consensus primers for the detection HPV Blot. L1 amplimers (220bp) was demonstrated on HK1 cell line (HPV negative) and oropharyngeal cancer tissue (HPV18). HPV18 was detected in HPV blot. SC: positive control, NC: negative control.

**Table S1.** Total 6 metastatic NPC patients' characteristics for PDX.

| Patient No. | Age (y/o) | Gender | Status at biopsy/operation |                       |                          | Previous treatment | PDX engraft | Overall survival (months) |
|-------------|-----------|--------|----------------------------|-----------------------|--------------------------|--------------------|-------------|---------------------------|
|             |           |        | Tissue source              | Biopsy(B)/Excision(E) | EBV DNA load (copies/mL) |                    |             |                           |
| 1           | 42        | Male   | Soft tissue(ST)            | E                     | 4,525                    | No                 | Yes         | 13                        |
| 3           | 64        | Male   | Lung(Lu)                   | B                     | 87                       | CCRT               | Yes         | 15                        |
| 11          | 52        | Male   | Liver(Li)                  | E                     | 3,060                    | CCRT               | Yes         | 7                         |
| 13          | 52        | Male   | Bone(B)                    | B                     | >2,000,000               | CT                 | Yes         | 5                         |
| 33          | 46        | Male   | Bone(B)                    | E                     | 13,348                   | CCRT               | Yes         | 15                        |
| 41          | 49        | Male   | Liver(Li)                  | B                     | 173                      | CCRT               | Yes         | 7                         |

1.CCRT: concurrent chemoradiotherapy; CT: chemotherapy.

2.The nomenclature system of our NPC PDX was NPC PDX-(tissue source abbreviation)(patient number). The NPC PDX-ST1 and PDX-B13 were corresponding to NPC PDX-ST and NPC PDX-Bone in reference [J Exp Clin Cancer Res. 2018 Sep 20;37(1):233.]. NPC PDX-B33 and NPC PDX-Li41 were new established NPC PDX lines and were under characterization.

3. NPC-B13 cell line had been passaged for more than 80 passages with EBV episome 40~50 copies/cell *in vitro* but would not form xenograft in NOD/SCID mice.

4.All these PDX lines harbored EBV except NPC PDX-Li41.
